# Supplementary material for: Anti-PTK7 Monoclonal Antibodies Exhibit Anti-Tumor Activity at the Cellular Level and in Mouse Xenograft Models of Esophageal Squamous Cell Carcinoma
Source: MDPI journal article supplement (doi:10.3390/ijms232012195), 2022-10-13
Supplement: s1 [file s1]

*Supplementary Materials*

## **Anti-PTK7 monoclonal antibodies exhibit anti-tumor activity at the cellular level and in mouse xenograft models of esophageal squamous cell carcinoma**

Jae Hoon Kim<sup>1</sup>, Won-Sik Shin<sup>1</sup>, Se-Ra Lee<sup>2</sup>, Sanggil Kim<sup>2</sup>, So-Young Choi<sup>2</sup> and Seung-Teak Lee<sup>1,\*</sup>

<sup>1</sup> Department of Biochemistry, College of Life Science and Biotechnology, Yonsei University, Seoul 03722, Republic of Korea

<sup>2</sup> New Drug Development Center, Osong Medical Innovation Foundation, Cheongju, Chungbuk 28160, Republic of Korea

\* Correspondence: stlee@yonsei.ac.kr; Tel.: +82-221232703

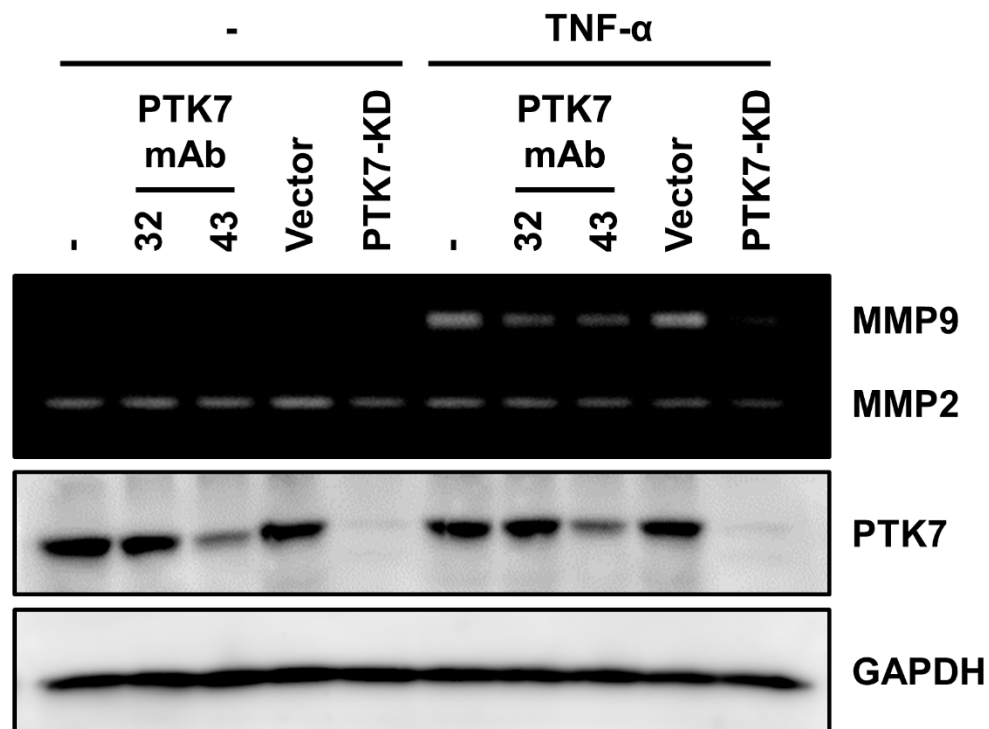

**Supplementary Figure S1.** Secretion of matrix metalloproteinase (MMP)-9 is enhanced by TNF- $\alpha$  treatment in KYSE-30 cells. MMP-2 and MMP-9 levels in the conditioned medium of KYSE-30 cells, which were incubated in serum-free DMEM/F12 medium with or without PTK7 monoclonal antibodies (10  $\mu$ g/mL) in the absence or the presence of TNF- $\alpha$  (1 ng/mL) for 24 h, were analyzed using gelatin zymography.
